# Supplementary material for: REFOCUS-PULSAR Recovery-Oriented Practice Training in Adult Primary Mental Health Care: Exploratory Findings Including From a Pretest–Posttest Evaluation
Source: PubMed Central journal article supplement (PMC8006334; doi:10.3389/fpsyt.2021.625408), 2021-03-11
Supplement: Image_2.pdf [file Image_2.pdf]

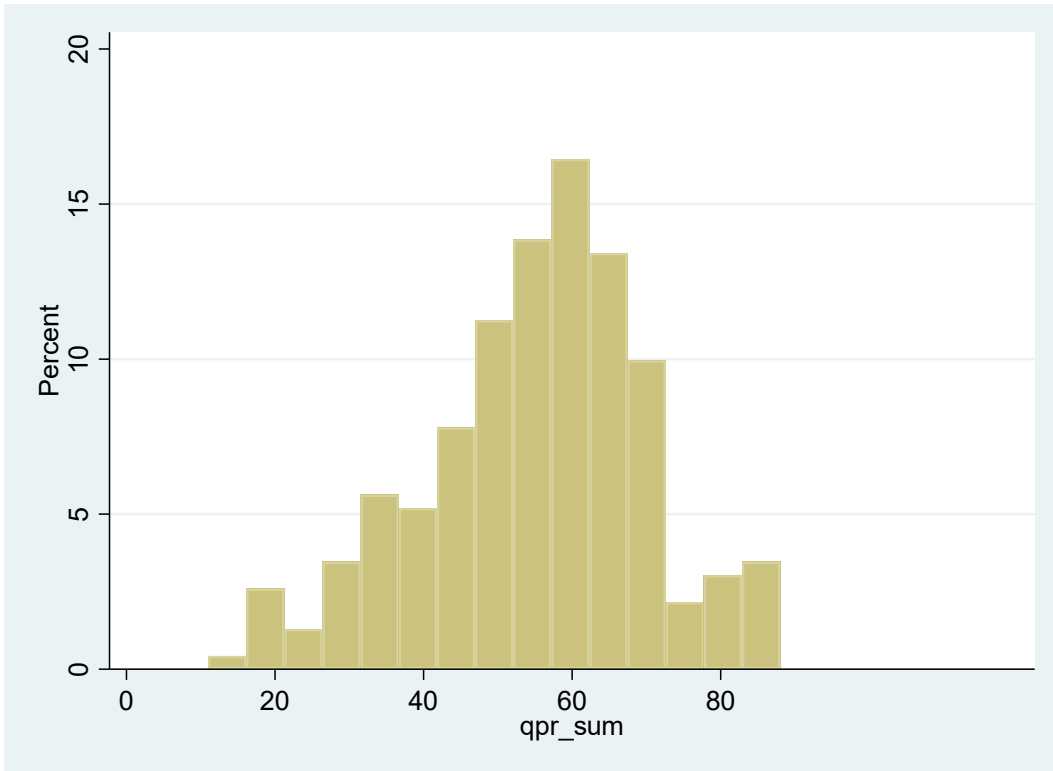

**Figure A. Outcome distribution of QPR scores from all 235 patients in this primary care trial.** QPR mean of 54.7, standard deviation of 15.2 (possible score ranges between 0 and 88).

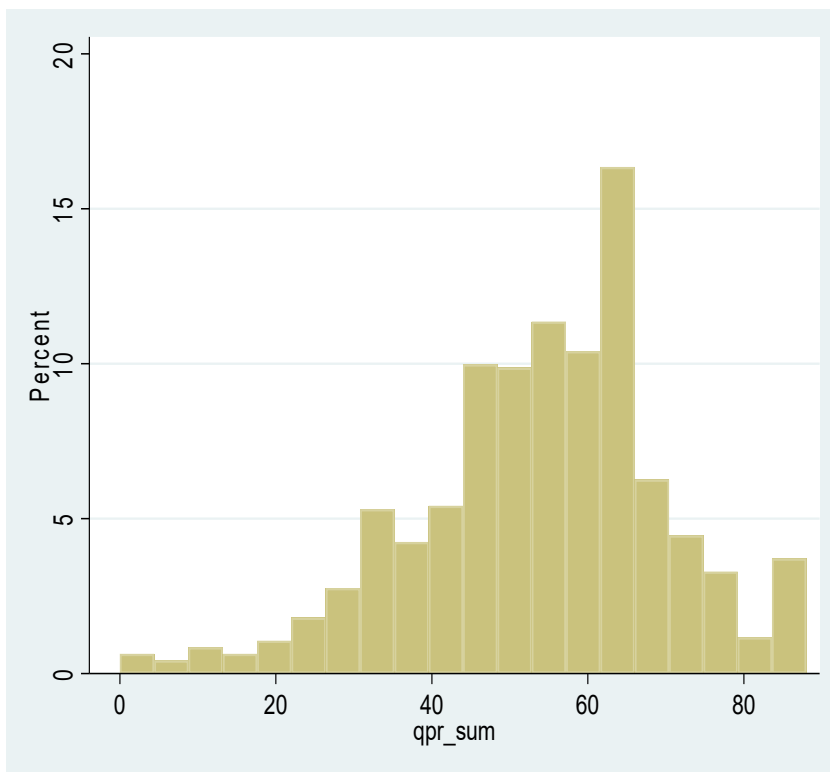

A two-sample Kolmogorov-Smirnov test for equality of distribution showed that these QPR datasets (A and B) appear to have the same distribution function (D-statistic= 0.047,  $p < 0.80$ ).

**Figure B. Outcome distribution of QPR scores from all 942 patients in secondary care from the trial by Meadows et al., (2019).** QPR mean of 54.0, standard deviation of 16.2 (possible score ranges between 0 and 88).
